# Supplementary material
Source: PubMed Central journal article supplement (PMC5963999)
Supplement: NIHMS943914-supplement-supplement_1.pdf [file NIHMS943914-supplement-supplement_1.pdf]

Supplemental Tables

Supplemental Table 1: Characteristics of excluded participants and analytic sample

|                                                              | N | Excluded participants | Analytic sample |
|--------------------------------------------------------------|---|-----------------------|-----------------|
|                                                              |   | 67                    | 34              |
|                                                              |   | M (SD)                | M (SD)          |
| Age (in years)                                               |   | 45.6 (13.3)           | 45.0 (13.3)     |
| Residency (in years) in current neighborhood                 |   | 11.0 (12.1)           | 15.9 (13.6)     |
|                                                              |   | %                     | %               |
| Women                                                        |   | 52.2                  | 55.9            |
| Race/ethnicity                                               |   |                       |                 |
| Non-Hispanic white                                           |   | 31.8                  | 17.6            |
| Hispanic/Latino                                              |   | 13.4                  | 20.6            |
| Non-Hispanic Black/African American                          |   | 55.2                  | 61.8            |
| Highest level of education completed                         |   |                       |                 |
| No high school diploma or GED                                |   | 16.4                  | 8.8             |
| High school diploma or GED only                              |   | 20.8                  | 29.4            |
| Trade/vocational school, associate's degree, or some college |   | 29.9                  | 38.2            |
| Bachelors degree or higher                                   |   | 32.9                  | 23.5            |
| Employment status <sup>a</sup>                               |   |                       |                 |
| Working now                                                  |   | 53.0                  | 32.4            |
| Retired                                                      |   | 7.6                   | 11.8            |
| Disabled                                                     |   | 13.6                  | 8.8             |
| Student                                                      |   | 4.5                   | 14.7            |
| Unemployed                                                   |   | 21.2                  | 17.6            |
| Other                                                        |   | 0.0                   | 14.7            |
| Annual household income                                      |   |                       |                 |
| Less than \$15,000                                           |   | 31.3                  | 33.3            |
| \$15,000 - \$29,999                                          |   | 31.3                  | 36.4            |
| \$30,000 or more                                             |   | 37.5                  | 30.3            |
| Receive government assistance (e.g., WIC, SNAP)              |   | 46.6                  | 52.9            |
| Own home                                                     |   | 19.4                  | 35.3            |
| Own or lease car                                             |   | 37.3                  | 38.2            |
| Current marital status                                       |   |                       |                 |
| Single or never married                                      |   | 56.7                  | 58.8            |
| Married/living with partner                                  |   | 22.4                  | 23.5            |
| Separated                                                    |   | 7.5                   | 5.9             |
| Divorced                                                     |   | 11.9                  | 11.8            |
| Widowed                                                      |   | 1.0                   | 0.0             |

M = mean SD = standard deviation GED = general equivalency diploma WIC = Supplemental Program for Women, Infants, and Children SNAP = Supplemental Nutrition Assistance Program

<sup>a</sup> Participants had the option to indicate more than one employment status. Responses were categorized hierarchically in the order listed (e.g. a participant who indicated they are both currently working and a student is classified here as currently working)

Supplemental Table 2: Descriptive statistics for cumulative day and mean daily activity space measures, days 7, 14, 21, and 28

|                                     | Cumulative Measures |           |           |           |            |            | Mean Daily Measures  |          |          |           |           |           |
|-------------------------------------|---------------------|-----------|-----------|-----------|------------|------------|----------------------|----------|----------|-----------|-----------|-----------|
|                                     | M (SD)              | Min       | Q1        | Med       | Q3         | Max        | M (SD)               | Min      | Q1       | Med       | Q3        | Max       |
| Convex Hull Area (mi <sup>2</sup> ) |                     |           |           |           |            |            |                      |          |          |           |           |           |
| 7                                   | 59.47<br>(77.85)    | 0.5<br>4  | 13.<br>05 | 25.<br>33 | 71.7<br>5  | 324.<br>14 | 13.30<br>(17.7<br>0) | 0.1<br>2 | 2.9<br>8 | 7.01      | 14.6<br>6 | 81.7<br>5 |
| 14                                  | 81.67<br>(87.48)    | 0.6<br>7  | 25.<br>83 | 42.<br>65 | 92.9<br>2  | 324.<br>25 | 11.48<br>(10.4<br>3) | 0.0<br>7 | 3.9<br>7 | 8.96      | 15.4<br>1 | 42.1<br>4 |
| 21                                  | 128.70<br>(142.89)  | 7.1<br>5  | 28.<br>27 | 58.<br>94 | 182.<br>08 | 533.<br>67 | 11.66<br>(9.47)      | 0.3<br>0 | 3.9<br>5 | 9.25      | 16.3<br>5 | 33.6<br>9 |
| 28                                  | 147.12<br>(146.33)  | 19.<br>83 | 43.<br>45 | 75.<br>27 | 200.<br>14 | 537.<br>87 | 10.89<br>(8.11)      | 0.3<br>5 | 4.9<br>5 | 9.07      | 15.2<br>4 | 30.4<br>6 |
| Supermarkets Count                  |                     |           |           |           |            |            |                      |          |          |           |           |           |
| 7                                   | 66.68<br>(61.98)    | 1         | 17        | 48.<br>5  | 105        | 274        | 16.15<br>(16.4<br>7) | 0.1<br>4 | 4.2<br>9 | 11.5<br>0 | 19.7<br>1 | 67.0<br>0 |
| 14                                  | 85.74<br>(62.70)    | 1         | 34        | 76        | 122        | 274        | 15.00<br>(14.1<br>1) | 0.0<br>7 | 4.0<br>7 | 11.8<br>6 | 18.8<br>6 | 69.2<br>9 |
| 21                                  | 118.47<br>(87.16)   | 11        | 51        | 88        | 173        | 366        | 15.02<br>(13.6<br>6) | 0.5<br>2 | 4.8<br>6 | 13.6<br>4 | 20.1<br>4 | 68.8<br>6 |
| 28                                  | 133.71<br>(87.45)   | 20        | 75        | 106       | 178        | 368        | 14.35<br>(13.2<br>3) | 0.6<br>4 | 5.5<br>7 | 11.9<br>3 | 18.6<br>1 | 71.1<br>8 |
| Density                             |                     |           |           |           |            |            |                      |          |          |           |           |           |
| 7                                   | 1.47 (0.56)         | 0.3<br>2  | 1.0<br>2  | 1.6<br>2  | 1.84       | 2.34       | 1.90<br>(1.82)       | 0.2<br>0 | 1.1<br>3 | 1.53      | 2.06      | 11.2<br>4 |
| 14                                  | 1.39 (0.55)         | 0.3<br>2  | 1.0<br>8  | 1.3<br>7  | 1.81       | 2.67       | 1.83<br>(1.37)       | 0.2<br>9 | 1.0<br>7 | 1.42      | 2.39      | 6.49      |
| 21                                  | 1.33 (0.57)         | 0.4<br>3  | 0.9<br>0  | 1.2<br>6  | 1.81       | 2.58       | 1.95<br>(1.87)       | 0.2<br>5 | 0.9<br>9 | 1.40      | 2.31      | 10.2<br>5 |
| 28                                  | 1.29 (0.58)         | 0.4<br>2  | 0.7<br>9  | 1.1<br>7  | 1.73       | 2.79       | 1.86<br>(1.50)       | 0.2<br>5 | 0.9<br>7 | 1.46      | 2.23      | 8.15      |
| Fast food restaurants Count         |                     |           |           |           |            |            |                      |          |          |           |           |           |
| 7                                   | 524.29              | 5         | 148       | 445       | 923        | 201        | 130.8                | 1.1      | 35.      | 72.1      | 202.      | 554.      |

|                   |                    |      |      |       |       |       |                  |      |       |        |        |        |
|-------------------|--------------------|------|------|-------|-------|-------|------------------|------|-------|--------|--------|--------|
|                   | (464.69)           |      |      |       |       | 7     | 2                | 4    | 43    | 4      | 86     | 43     |
|                   |                    |      |      |       |       |       | (134.12)         |      |       |        |        |        |
|                   |                    |      |      |       |       |       | 121.28           | 0.64 | 33.57 | 100.86 | 168.57 | 574.57 |
| 14                | 687.88<br>(486.76) | 7    | 252  | 662.5 | 981   | 2017  | (119.19)         |      |       |        |        |        |
|                   |                    |      |      |       |       |       | 118.57           | 3.95 | 32.38 | 104.40 | 149.48 | 568.62 |
| 21                | 939.47<br>(680.58) | 91   | 420  | 805   | 1349  | 2835  | (113.55)         |      |       |        |        |        |
|                   |                    |      |      |       |       |       | 113.21           | 5.14 | 38.57 | 102.21 | 127.39 | 579.93 |
| 28                | 1059.50<br>(681.3) | 118  | 578  | 895.5 | 1361  | 2849  | (109.59)         |      |       |        |        |        |
| Density           |                    |      |      |       |       |       |                  |      |       |        |        |        |
| 7                 | 12.17<br>(6.29)    | 2.97 | 6.62 | 11.63 | 16.74 | 26.35 | 13.03<br>(8.46)  | 1.33 | 6.67  | 12.36  | 16.90  | 41.17  |
| 14                | 11.37<br>(5.65)    | 2.97 | 6.53 | 10.44 | 15.12 | 25.24 | 12.89<br>(6.76)  | 2.59 | 6.07  | 13.23  | 18.69  | 26.72  |
| 21                | 10.67<br>(5.22)    | 3.28 | 6.10 | 10.26 | 14.37 | 23.14 | 12.15<br>(5.80)  | 2.66 | 7.25  | 12.32  | 17.36  | 23.50  |
| 28                | 10.36<br>(5.43)    | 3.41 | 5.93 | 9.17  | 14.37 | 25.97 | 12.32<br>(5.63)  | 2.75 | 6.87  | 12.90  | 15.29  | 22.01  |
| Parks Count       |                    |      |      |       |       |       |                  |      |       |        |        |        |
| 7                 | 78.06<br>(89.06)   | 1    | 22   | 40    | 102   | 355   | 18.68<br>(20.97) | 0.57 | 4.57  | 11.43  | 19.57  | 93.00  |
| 14                | 107.00<br>(100.77) | 2    | 35   | 66.5  | 132   | 355   | 16.54<br>(13.69) | 0.36 | 6.14  | 13.71  | 21.07  | 49.29  |
| 21                | 163.06<br>(164.31) | 14   | 45   | 89    | 237   | 618   | 16.70<br>(12.75) | 0.86 | 6.62  | 15.19  | 23.67  | 45.67  |
| 28                | 187.74<br>(176.26) | 25   | 64   | 105   | 258   | 653   | 15.67<br>(11.26) | 0.68 | 7.04  | 14.05  | 20.21  | 47.07  |
| Land <sup>a</sup> |                    |      |      |       |       |       |                  |      |       |        |        |        |
| 7                 | 0.05 (0.05)        | 0.01 | 0.04 | 0.05  | 0.06  | 0.29  | 0.04<br>(0.03)   | 0.00 | 0.02  | 0.03   | 0.04   | 0.19   |
| 14                | 0.06 (0.04)        | 0.02 | 0.04 | 0.05  | 0.06  | 0.26  | 0.03             | 0.00 | 0.00  | 0.03   | 0.04   | 0.10   |

|                                          |             |     |     |     |      |      |        |        |     |      |      |      |      |
|------------------------------------------|-------------|-----|-----|-----|------|------|--------|--------|-----|------|------|------|------|
|                                          |             |     |     |     |      |      |        | (0.02) | 1   | 2    |      |      |      |
|                                          |             | 0.0 | 0.0 | 0.0 |      |      |        | 0.03   | 0.0 | 0.0  | 0.03 | 0.04 | 0.08 |
| 21                                       | 0.06 (0.02) | 3   | 4   | 5   | 0.07 | 0.12 |        | (0.02) | 1   | 2    |      |      |      |
|                                          |             | 0.0 | 0.0 | 0.0 |      |      |        | 0.03   | 0.0 | 0.0  | 0.03 | 0.04 | 0.08 |
| 28                                       | 0.06 (0.02) | 3   | 4   | 5   | 0.06 | 0.12 |        | (0.02) | 1   | 2    |      |      |      |
| 500m Route Buffer Area (m <sup>2</sup> ) |             |     |     |     |      |      |        |        |     |      |      |      |      |
|                                          | 23.74       | 1.9 | 12. | 18. | 30.1 | 77.4 | 7.52   | 1.0    | 4.1 | 6.75 | 11.2 | 17.5 |      |
| 7                                        | (16.78)     | 7   | 40  | 59  | 9    | 9    | (4.45) | 8      | 3   |      | 2    | 4    |      |
|                                          | 31.72       | 2.2 | 19. | 27. | 36.2 | 77.9 | 6.98   | 1.1    | 3.6 | 6.76 | 9.90 | 14.6 |      |
| 14                                       | (18.22)     | 5   | 27  | 77  | 7    | 7    | (3.57) | 4      | 9   |      |      | 0    |      |
|                                          | 41.32       | 7.6 | 24. | 32. | 57.4 | 94.9 | 6.80   | 1.3    | 3.6 | 6.59 | 9.32 | 14.1 |      |
| 21                                       | (23.99)     | 5   | 99  | 96  | 2    | 6    | (3.44) | 0      | 3   |      |      | 4    |      |
|                                          | 46.25       | 13. | 28. | 38. | 66.3 | 97.1 | 6.59   | 1.1    | 4.1 | 6.73 | 8.88 | 13.3 |      |
| 28                                       | (24.31)     | 09  | 40  | 48  | 4    | 0    | (3.18) | 7      | 5   |      |      | 3    |      |
| Supermarkets Count                       |             |     |     |     |      |      |        |        |     |      |      |      |      |
|                                          | 36.06       |     |     | 32. |      |      | 11.13  | 2.0    | 5.1 | 10.2 | 15.8 | 25.4 |      |
| 7                                        | (21.21)     | 3   | 18  | 5   | 51   | 87   | (6.88) | 0      | 4   | 1    | 6    | 3    |      |
|                                          | 46.41       |     |     | 45. |      |      | 10.75  | 1.2    | 5.2 | 10.2 | 14.7 | 28.6 |      |
| 14                                       | (23.99)     | 6   | 28  | 5   | 64   | 111  | (6.61) | 9      | 1   | 1    | 1    | 4    |      |
|                                          | 57.85       |     |     |     |      |      | 10.54  | 1.2    | 5.1 | 10.0 | 15.1 | 29.8 |      |
| 21                                       | (29.69)     | 9   | 36  | 59  | 76   | 131  | (6.46) | 9      | 4   | 2    | 0    | 6    |      |
|                                          | 64.06       |     |     |     |      |      | 10.30  | 1.5    | 5.2 | 10.2 | 13.1 | 29.9 |      |
| 28                                       | (30.49)     | 17  | 42  | 62  | 83   | 150  | (6.29) | 4      | 1   | 0    | 8    | 6    |      |
| Density                                  |             |     |     |     |      |      |        |        |     |      |      |      |      |
|                                          |             | 0.5 | 1.1 | 1.7 |      |      | 1.64   | 0.3    | 1.1 | 1.70 | 2.01 | 2.97 |      |
| 7                                        | 1.68 (0.60) | 2   | 6   | 4   | 2.16 | 2.88 | (0.66) | 5      | 5   |      |      |      |      |
|                                          |             | 0.4 | 1.1 | 1.6 |      |      | 1.63   | 0.2    | 1.2 | 1.54 | 1.99 | 3.10 |      |
| 14                                       | 1.62 (0.62) | 0   | 3   | 6   | 2.00 | 2.89 | (0.66) | 5      | 2   |      |      |      |      |
|                                          |             | 0.4 | 1.1 | 1.4 |      |      | 1.65   | 0.2    | 1.0 | 1.59 | 2.09 | 3.44 |      |
| 21                                       | 1.53 (0.57) | 0   | 7   | 5   | 1.88 | 2.87 | (0.72) | 7      | 8   |      |      |      |      |
|                                          |             | 0.5 | 1.1 | 1.4 |      |      | 1.63   | 0.2    | 1.0 | 1.53 | 2.12 | 3.37 |      |
| 28                                       | 1.51 (0.57) | 5   | 1   | 7   | 1.87 | 2.99 | (0.71) | 6      | 9   |      |      |      |      |
| Fast food restaurants Count              |             |     |     |     |      |      |        |        |     |      |      |      |      |
|                                          |             |     |     |     |      |      | 92.28  | 6.1    | 36. | 86.7 | 118. | 293. |      |
| 7                                        | 300.09      |     |     |     |      |      | (72.7  | 4      | 71  | 1    | 14   | 00   |      |
|                                          | (206.34)    | 15  | 112 | 307 | 425  | 726  | 2)     |        |     |      |      |      |      |
|                                          |             |     |     |     |      |      | 90.08  | 5.0    | 38. | 81.7 | 118. | 278. |      |
| 14                                       | 404.68      |     |     | 433 |      |      | (70.1  | 0      | 21  | 1    | 00   | 07   |      |
|                                          | (242.78)    | 19  | 177 | .5  | 552  | 965  | 6)     |        |     |      |      |      |      |

|                                |    |                    |          |          |           |           |           |                      |           |           |           |            |            |
|--------------------------------|----|--------------------|----------|----------|-----------|-----------|-----------|----------------------|-----------|-----------|-----------|------------|------------|
|                                |    |                    |          |          |           |           |           | 86.04                | 9.1       | 36.       | 74.2      | 118.       | 280.       |
|                                | 21 | 500.38<br>(260.29) | 61       | 324      | 524       | 687       | 107<br>5  | (64.2<br>2)          | 4         | 19        | 1         | 24         | 90         |
|                                | 28 | 554.82<br>(255.68) | 113      | 419      | 570       | 719       | 109<br>7  | 84.01<br>(60.5<br>7) | 12.<br>00 | 37.<br>32 | 73.1<br>8 | 107.<br>25 | 276.<br>00 |
| Density                        |    |                    |          |          |           |           |           |                      |           |           |           |            |            |
|                                | 7  | 13.54<br>(7.22)    | 4.2<br>7 | 6.4<br>8 | 14.<br>45 | 18.2<br>1 | 28.0<br>1 | 13.04<br>(7.52)      | 3.0<br>9  | 5.6<br>3  | 12.7<br>6 | 18.1<br>3  | 30.9<br>3  |
|                                | 14 | 13.48<br>(6.40)    | 2.9<br>4 | 7.0<br>1 | 14.<br>75 | 18.2<br>9 | 25.1<br>1 | 13.05<br>(7.22)      | 3.3<br>1  | 6.2<br>7  | 12.9<br>7 | 17.8<br>4  | 33.7<br>6  |
|                                | 21 | 13.19<br>(5.66)    | 3.0<br>5 | 9.4<br>5 | 12.<br>79 | 17.8<br>5 | 22.9<br>2 | 12.76<br>(6.99)      | 3.3<br>8  | 6.9<br>8  | 12.1<br>3 | 17.1<br>4  | 34.0<br>2  |
|                                | 28 | 13.29<br>(6.12)    | 4.0<br>4 | 9.7<br>4 | 11.<br>82 | 17.6<br>9 | 30.3<br>0 | 12.85<br>(7.17)      | 3.3<br>4  | 7.0<br>3  | 12.1<br>7 | 17.3<br>4  | 36.8<br>9  |
| Parks<br>Count                 |    |                    |          |          |           |           |           |                      |           |           |           |            |            |
|                                | 7  | 38.50<br>(24.85)   | 4        | 20       | 30.<br>5  | 50        | 95        | 12.07<br>(7.71)      | 1.4<br>3  | 6.2<br>9  | 9.71      | 17.0<br>0  | 31.8<br>6  |
|                                | 14 | 50.68<br>(28.94)   | 5        | 31       | 45        | 65        | 117       | 11.82<br>(6.65)      | 1.4<br>3  | 5.7<br>1  | 11.7<br>1 | 15.7<br>1  | 25.7<br>1  |
|                                | 21 | 65.03<br>(36.60)   | 13       | 35       | 55.<br>5  | 85        | 154       | 11.71<br>(6.34)      | 1.2<br>9  | 6.0<br>0  | 11.4<br>0 | 14.6<br>2  | 25.1<br>4  |
|                                | 28 | 72.47<br>(36.29)   | 17       | 44       | 62.<br>5  | 103       | 154       | 11.37<br>(5.84)      | 1.0<br>7  | 7.0<br>0  | 11.5<br>4 | 15.3<br>2  | 25.6<br>4  |
| Land <sup>a</sup>              |    |                    |          |          |           |           |           |                      |           |           |           |            |            |
|                                | 7  | 0.06 (0.03)        | 0.0<br>1 | 0.0<br>3 | 0.0<br>5  | 0.07      | 0.17      | 0.05<br>(0.03)       | 0.0<br>1  | 0.0<br>3  | 0.04      | 0.05       | 0.20       |
|                                | 14 | 0.06 (0.03)        | 0.0<br>3 | 0.0<br>4 | 0.0<br>5  | 0.07      | 0.15      | 0.04<br>(0.03)       | 0.0<br>1  | 0.0<br>3  | 0.04      | 0.05       | 0.20       |
|                                | 21 | 0.06 (0.02)        | 0.0<br>3 | 0.0<br>4 | 0.0<br>5  | 0.07      | 0.12      | 0.05<br>(0.03)       | 0.0<br>1  | 0.0<br>3  | 0.04      | 0.05       | 0.18       |
|                                | 28 | 0.06 (0.02)        | 0.0<br>3 | 0.0<br>4 | 0.0<br>5  | 0.06      | 0.10      | 0.04<br>(0.03)       | 0.0<br>1  | 0.0<br>3  | 0.04      | 0.05       | 0.18       |
| Kernel Density<br>Supermarkets |    |                    |          |          |           |           |           |                      |           |           |           |            |            |
|                                | 7  | 0.80 (1.03)        | 0.0<br>1 | 0.1<br>4 | 0.3<br>0  | 0.98      | 3.90      | 0.80<br>(1.03)       | 0.0<br>1  | 0.1<br>4  | 0.30      | 0.98       | 3.90       |
|                                | 14 | 0.79 (1.02)        | 0.0<br>1 | 0.1<br>0 | 0.3<br>8  | 0.84      | 4.00      | 0.78<br>(1.02)       | 0.0<br>1  | 0.1<br>0  | 0.37      | 0.83       | 4.00       |
|                                | 21 | 0.79 (1.03)        | 0.0<br>1 | 0.0<br>9 | 0.3<br>4  | 0.89      | 3.98      | 0.78<br>(1.03)       | 0.0<br>1  | 0.0<br>9  | 0.33      | 0.89       | 3.98       |
|                                | 28 | 0.80 (1.03)        | 0.0      | 0.0      | 0.3       | 1.03      | 3.93      | 0.80                 | 0.0       | 0.0       | 0.33      | 1.02       | 3.93       |

|                       |               |     |     |     |      |      |        |     |     |      |      |      |  |
|-----------------------|---------------|-----|-----|-----|------|------|--------|-----|-----|------|------|------|--|
|                       |               | 1   | 9   | 3   |      |      | (1.03) | 1   | 9   |      |      |      |  |
| Fast food restaurants |               |     |     |     |      |      |        |     |     |      |      |      |  |
|                       |               | 0.2 | 2.7 | 4.7 |      | 14.6 | 5.19   | 0.2 | 2.8 | 4.71 | 8.18 | 14.6 |  |
| 7                     | 5.18 (3.53)   | 1   | 6   | 1   | 8.18 | 3    | (3.54) | 1   | 2   |      |      | 3    |  |
|                       |               | 0.2 | 2.1 | 4.5 |      | 14.4 | 5.02   | 0.2 | 2.1 | 4.59 | 7.90 | 14.4 |  |
| 14                    | 5.03 (3.41)   | 7   | 2   | 9   | 7.9  | 3    | (3.40) | 7   | 2   |      |      | 3    |  |
|                       |               | 0.2 | 1.7 | 4.6 |      | 13.6 | 4.99   | 0.2 | 1.7 | 4.68 | 7.12 | 13.6 |  |
| 21                    | 5.00 (3.36)   | 7   | 6   | 8   | 7.12 | 2    | (3.35) | 7   | 6   |      |      | 2    |  |
|                       |               | 0.5 | 2.0 | 4.8 |      | 14.1 | 5.09   | 0.5 | 2.0 | 4.81 | 7.71 | 14.1 |  |
| 28                    | 5.10 (3.43)   | 1   | 0   | 3   | 7.71 | 4    | (3.42) | 1   | 0   |      |      | 4    |  |
| Parks                 |               |     |     |     |      |      |        |     |     |      |      |      |  |
|                       |               |     |     |     |      |      | 24.84  | 0.0 | 8.0 | 18.3 | 26.7 | 171. |  |
| 7                     | 24.85 (31.73) | 0.0 | 8.0 | 18. | 26.7 | 171. | (31.7  | 0   | 3   | 4    | 4    | 82   |  |
|                       |               | 0   | 3   | 35  | 4    | 82   | 4)     |     |     |      |      |      |  |
|                       |               |     |     |     |      |      | 25.21  | 0.0 | 10. | 19.6 | 27.6 | 169. |  |
| 14                    | 25.24 (31.18) | 0.0 | 10. | 19. | 27.6 | 169. | (31.1  | 0   | 22  | 2    | 3    | 16   |  |
|                       |               | 0   | 22  | 62  | 6    | 16   | 7)     |     |     |      |      |      |  |
|                       |               |     |     |     |      |      | 24.81  | 0.0 | 9.4 | 19.8 | 28.4 | 164. |  |
| 21                    | 24.82 (30.46) | 0.0 | 9.4 | 19. | 29.2 | 164. | (30.4  | 0   | 0   | 8    | 3    | 11   |  |
|                       |               | 0   | 0   | 88  | 1    | 11   | 5)     |     |     |      |      |      |  |
|                       |               |     |     |     |      |      | 24.48  | 0.0 | 8.3 | 19.1 | 27.5 | 163. |  |
| 28                    | 24.48 (30.32) | 0.0 | 8.3 | 19. | 27.6 | 163. | (30.3  | 0   | 5   | 9    | 9    | 23   |  |
|                       |               | 0   | 8   | 19  | 1    | 23   | 2)     |     |     |      |      |      |  |

M = mean SD = standard deviation Min = minimum Q = quartile Med = median  
 Max = maximum mi = miles

<sup>a</sup> Park land measures for convex hull and 500m route buffer are the proportion of the activity space area that is parkland

## Highlights

- In contrast to current norm of 7 days, at least 14 days of valid GPS monitoring are needed.
- Days for valid estimates varied by activity space representation, measure, and environmental attribute.
- Kernel density measures achieved reliable estimates after a few days.
- Reliable estimates were not found for convex hull and route buffer measures.
- Activity space attributes, when not weighted by time, vary considerably day-to-day.
